# Supplementary material for: Multivalent cationic dendrofullerenes for gene transfer: synthesis and DNA complexation
Source: Royal Society of Chemistry journal article supplement (doi:10.1039/d0tb00113a), 2020-01-01
Supplement: d0tb00113a1.pdf [file d0tb00113a1.pdf]

*Electronic Supporting Information*

# Multivalent cationic dendrofullerenes for gene transfer: synthesis and DNA complexation

Beatriz M. Illescas,<sup>\*[a]</sup> Alfonso Pérez-Sánchez,<sup>[a]</sup> Araceli Mallo,<sup>[b]</sup> Ángel Martín-Domenech,<sup>[a]</sup> Ignacio Rodríguez-Crespo,<sup>\*[c]</sup> and Nazario Martín<sup>\*[a,d]</sup>

<sup>[a]</sup> Departamento de Química Orgánica, Facultad de Química, Universidad Complutense de Madrid, Av. Complutense s/n, 28040 Madrid (Spain), Email: [beti@ucm.es](mailto:beti@ucm.es) and [nazmar@ucm.es](mailto:nazmar@ucm.es)

<sup>[b]</sup> Facultad de Ciencias Experimentales, Universidad Francisco de Vitoria, Pozuelo de Alarcón, Madrid 28223, Spain

<sup>[c]</sup> Departamento de Bioquímica, Facultad de Química, Universidad Complutense de Madrid, Av. Complutense s/n, 28040 Madrid (Spain), Email: [jirodrig@ucm.es](mailto:jirodrig@ucm.es)

<sup>[d]</sup> IMDEA-Nanoscience, C/ Faraday 9, Campus Cantoblanco, 28049 Madrid, Spain.

|                                                                                            |            |
|--------------------------------------------------------------------------------------------|------------|
| <b>Table of Contents</b> .....                                                             | <b>S1</b>  |
| General .....                                                                              | <b>S2</b>  |
| <sup>1</sup> H NMR (top) and <sup>13</sup> C NMR (bottom) spectra of amino compounds ..... | <b>S3</b>  |
| <sup>1</sup> H NMR (top) and FTIR (bottom) spectra of cationic compounds .....             | <b>S13</b> |
| Determination of the N/P ratios .....                                                      | <b>S17</b> |
| Cytotoxicity assay .....                                                                   | <b>S17</b> |
| DLS Experiments .....                                                                      | <b>S18</b> |

**General.** Reagents and solvents were purchased as reagent grade and used without further purification. 1-(chloromethyl)-3,5-bis(prop-2-yn-1-yloxy)benzene (**1a**),<sup>1</sup> 5-

(chloromethyl)-1,2,3-tris(prop-2-yn-1-yloxy)benzene (**1b**)<sup>2</sup> and *tert*-butyl (2-(2-(2-azidoethoxy)ethoxy)ethyl)carbamate (**2**)<sup>3</sup> were prepared according to previously reported procedures. For column chromatography, silica gel 60 (230-400 mesh, 0.040-0.063 mm) was purchased from Scharlab. Thin Layer Chromatography (TLC) was performed on aluminium sheets coated with silica gel 60 F<sub>254</sub> purchased from E. Merck, visualization by UV light. IR spectra (cm<sup>-1</sup>) were measured on a Bruker Tensor 27 instrument equipped with an ATR device FTIR instrument and using KBr for water-soluble compounds or dissolved in the proper solvent when possible. NMR spectra were recorded on a Bruker AC 300, AC 500 or AC 700 with solvent peaks as reference. <sup>1</sup>H and <sup>13</sup>C NMR spectra were obtained for solutions in CDCl<sub>3</sub> and DMSO-d<sub>6</sub>. All the assignments were confirmed by two-dimensional NMR experiments.

<sup>1</sup>H NMR (top) and <sup>13</sup>C NMR (bottom) spectra of amino compounds.

**Compound 3a.**

---

<sup>1</sup> Wu, P.; Feldman, A. K.; Nugent, A. K.; Hawker, C. J.; Scheel, A.; Voit, B.; Pyun, J.; Fréchet, J. M. J.; Sharpless, K. B.; Fokin, V. V. *Angew. Chem. Int. Ed.* **2004**, *43*, 3928-3932.

<sup>2</sup> Qin, T.; Li, X.; Chen, J.; Zeng, Y.; Yu, T.; Yang, G.; Li, Y. *Chem. Asian J.* **2014**, *9*, 3641-3649.

<sup>3</sup> Itoh, Y.; Ishikawa, M.; Kitaguchi, R.; Sato, S.; Naito, M.; Hashimoto, Y. *Bioorg. Med. Chem.* **2011**, *19*, 3229-3241.

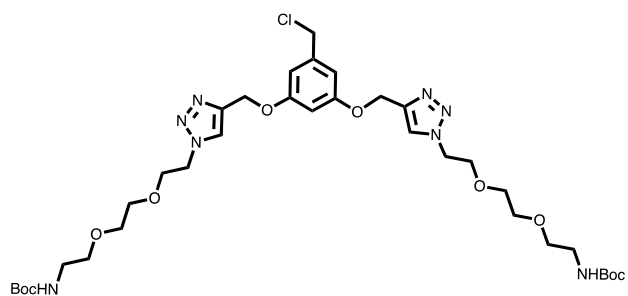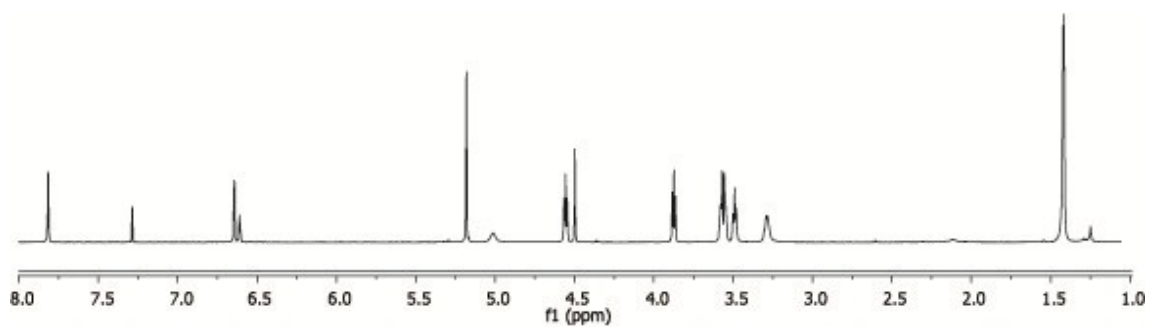

<sup>1</sup>H NMR spectrum (500 MHz, CDCl<sub>3</sub>) of compound **3a**

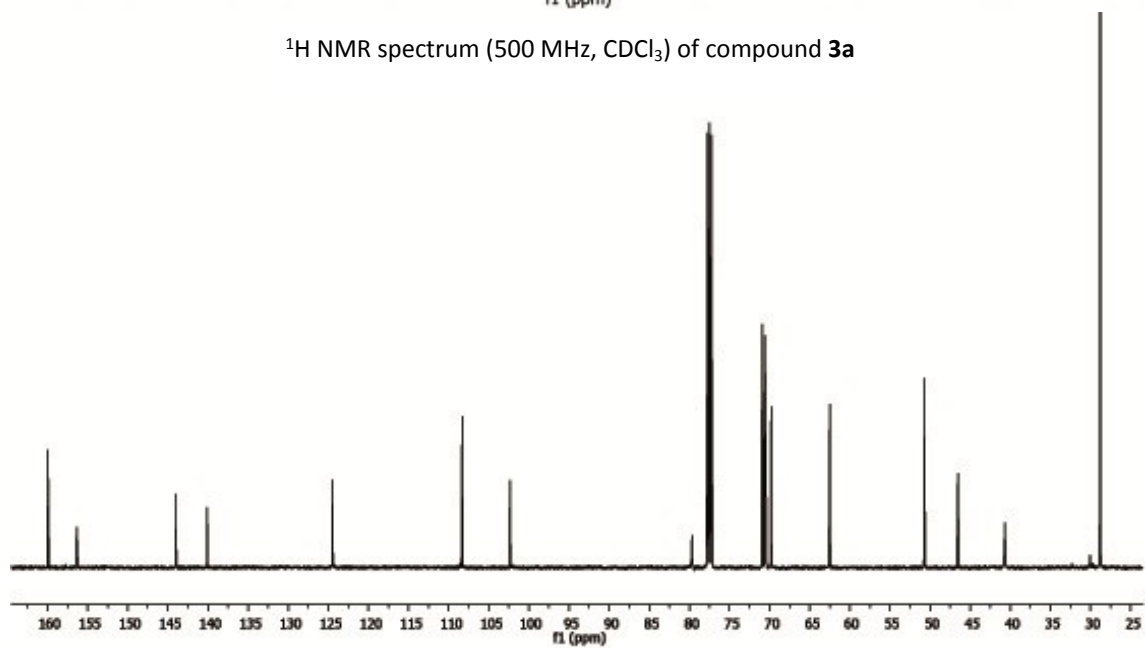

<sup>13</sup>C NMR spectrum (125 MHz, CDCl<sub>3</sub>) of compound **3a**

Compound 3b.

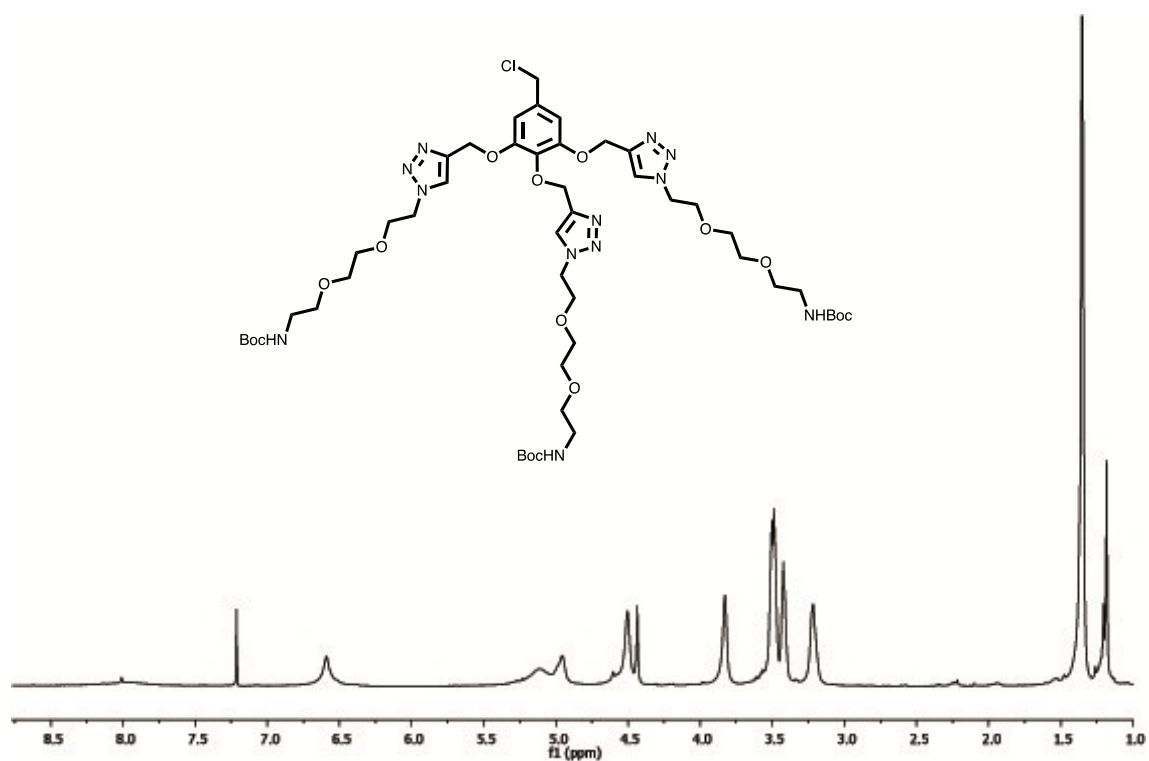

<sup>1</sup>H NMR spectrum (500 MHz, CDCl<sub>3</sub>) of compound 3b

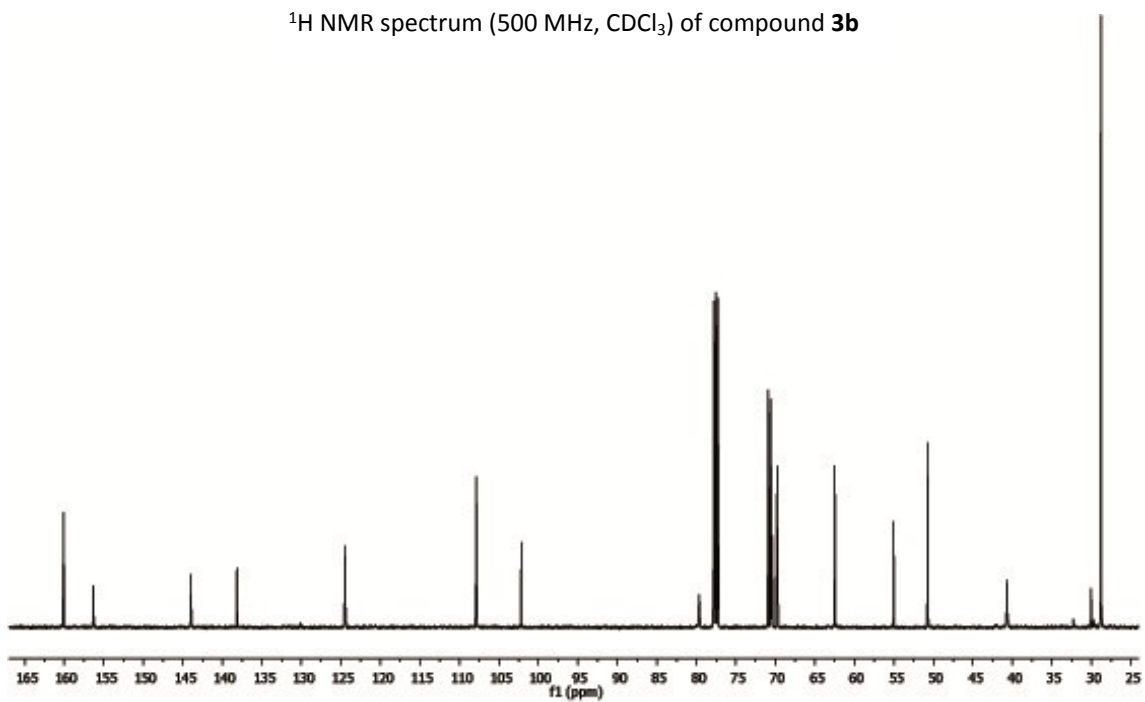

<sup>13</sup>C NMR spectrum (125 MHz, CDCl<sub>3</sub>) of compound 3b

Compound 4a.

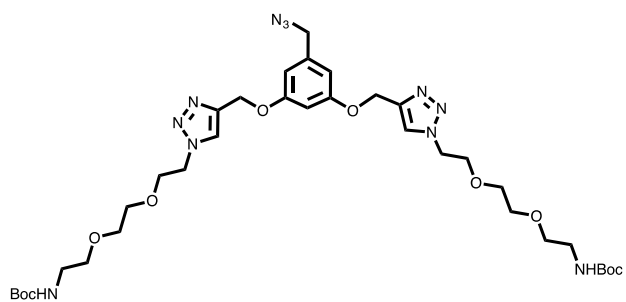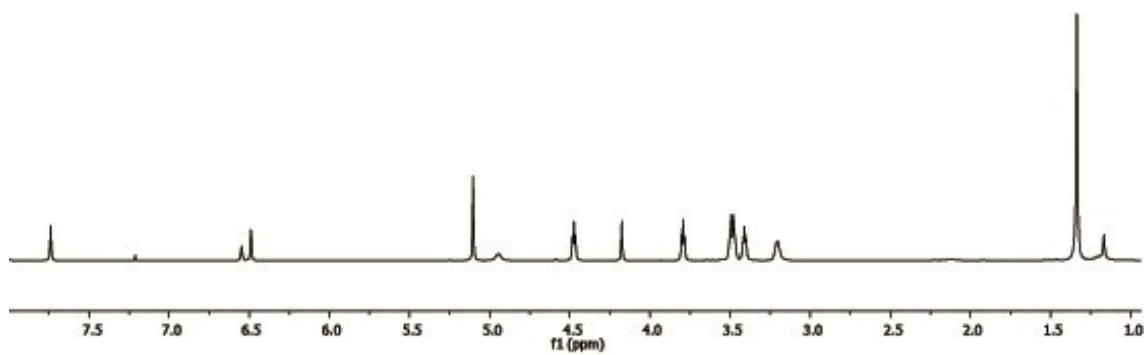

$^1\text{H}$  NMR spectrum (500 MHz,  $\text{CDCl}_3$ ) of compound 4a

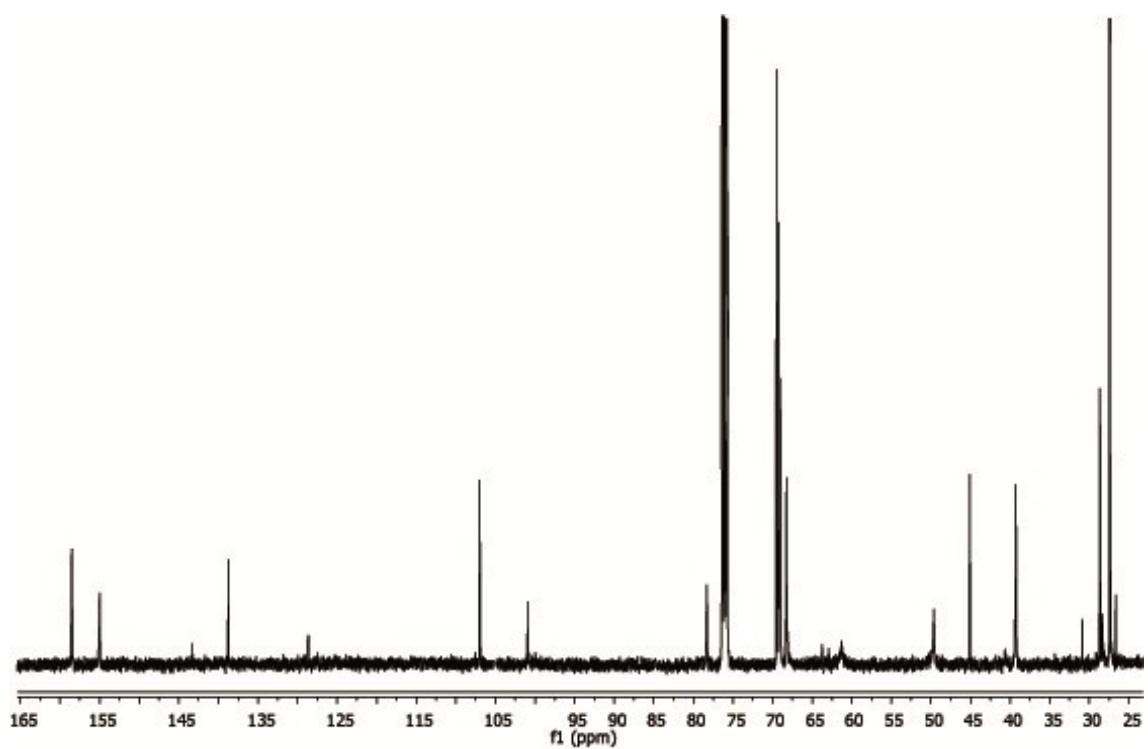

$^{13}\text{C}$  NMR spectrum (125 MHz,  $\text{CDCl}_3$ ) of compound 4a

**Compound 4b.**

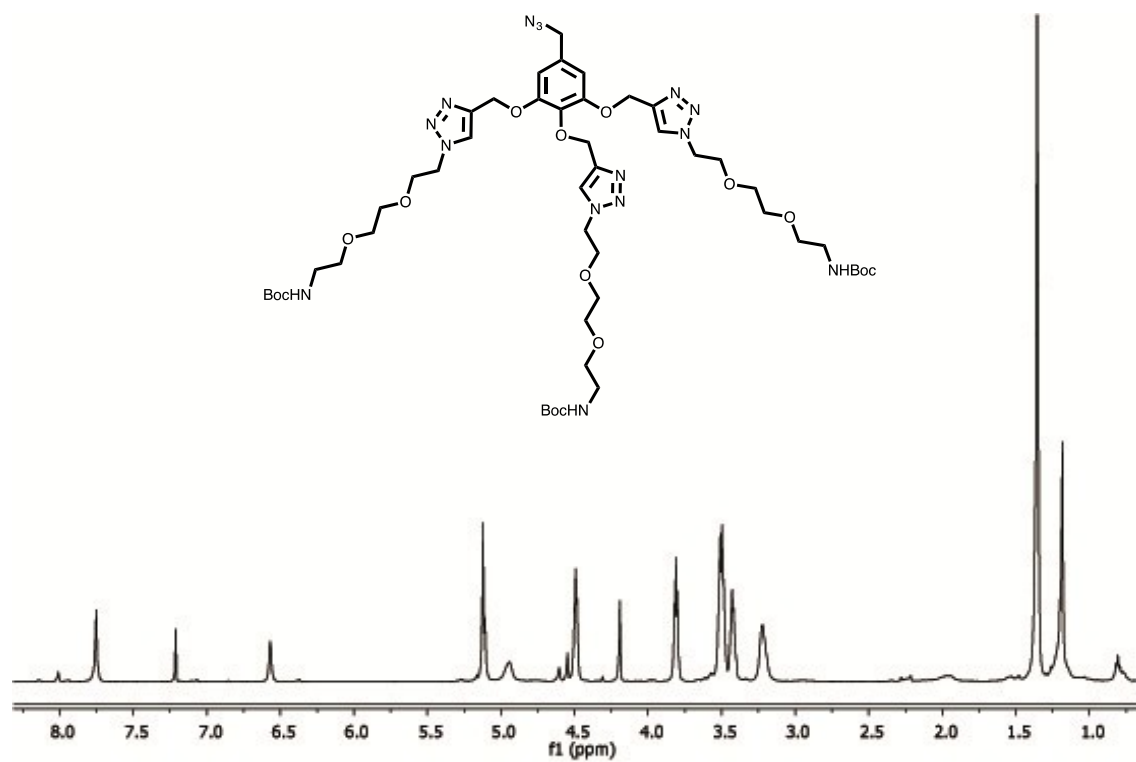

<sup>1</sup>H NMR spectrum (500 MHz, CDCl<sub>3</sub>) of compound **4b**

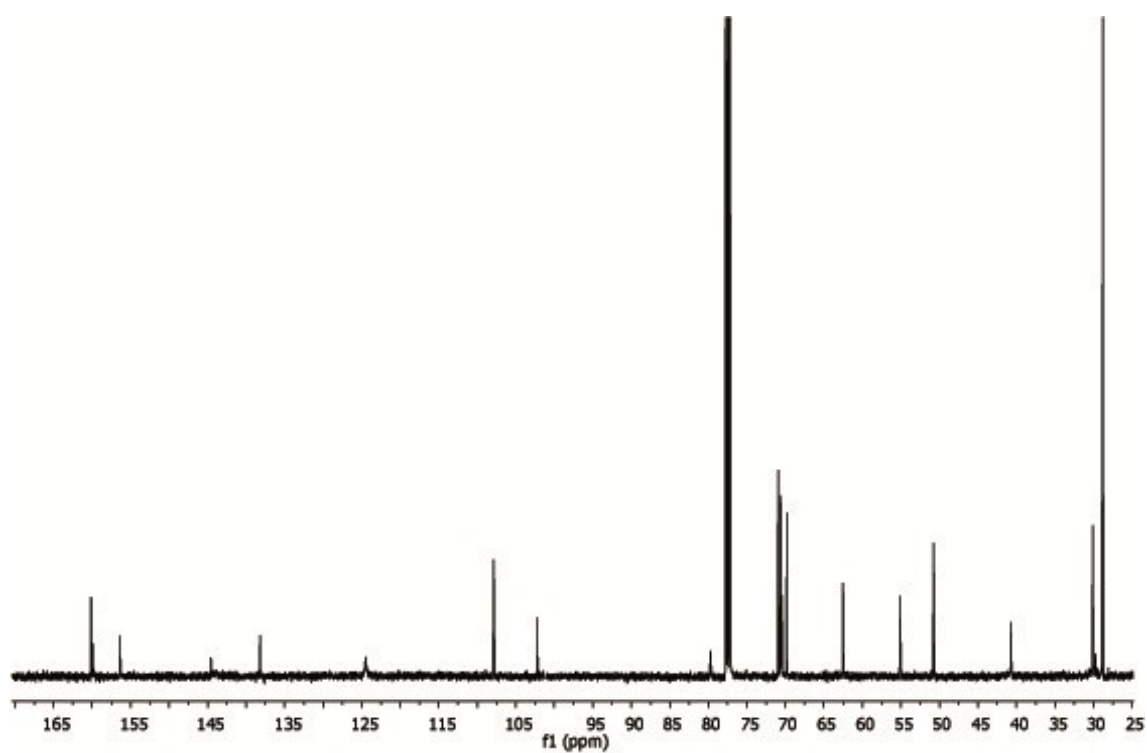

<sup>13</sup>C NMR spectrum (125 MHz, CDCl<sub>3</sub>) of compound **4b**

**Compound 6a.**

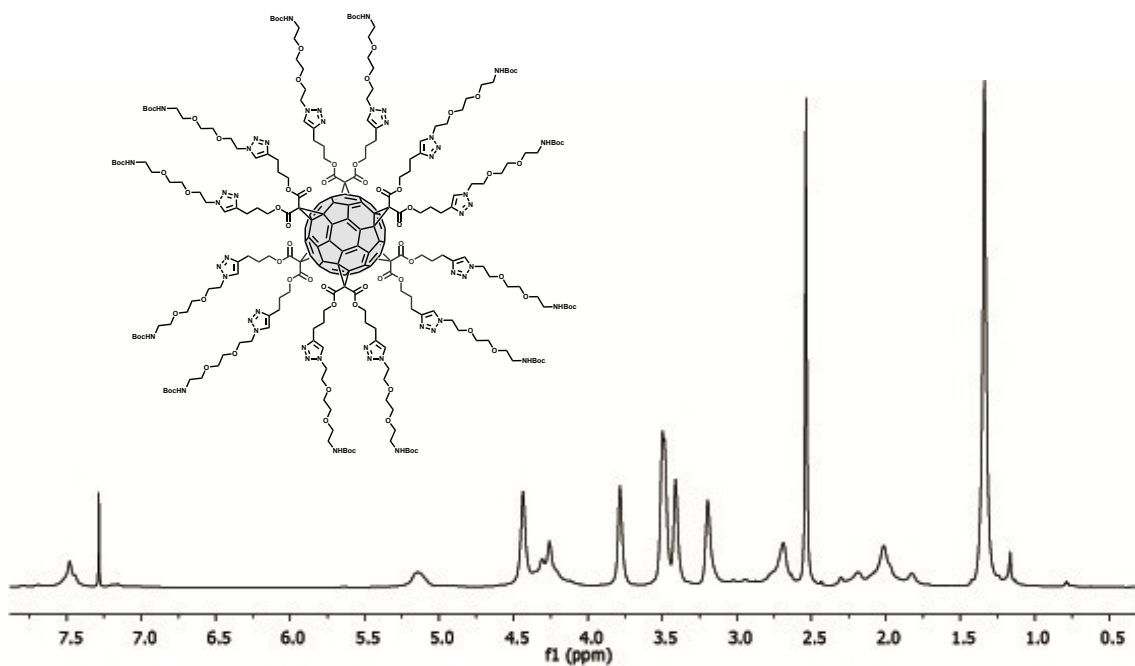

<sup>1</sup>H NMR spectrum (700 MHz, CDCl<sub>3</sub>) of compound 6a

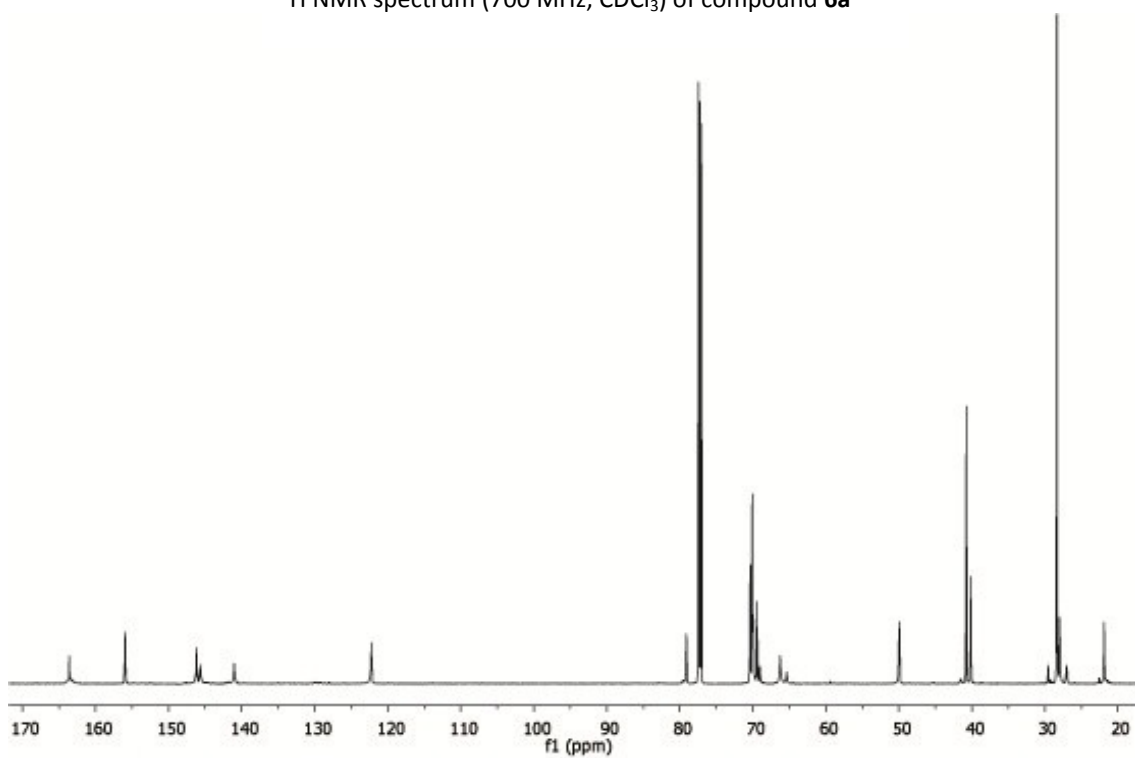

<sup>13</sup>C NMR spectrum (175 MHz, CDCl<sub>3</sub>) of compound 6a

Compound 6b.

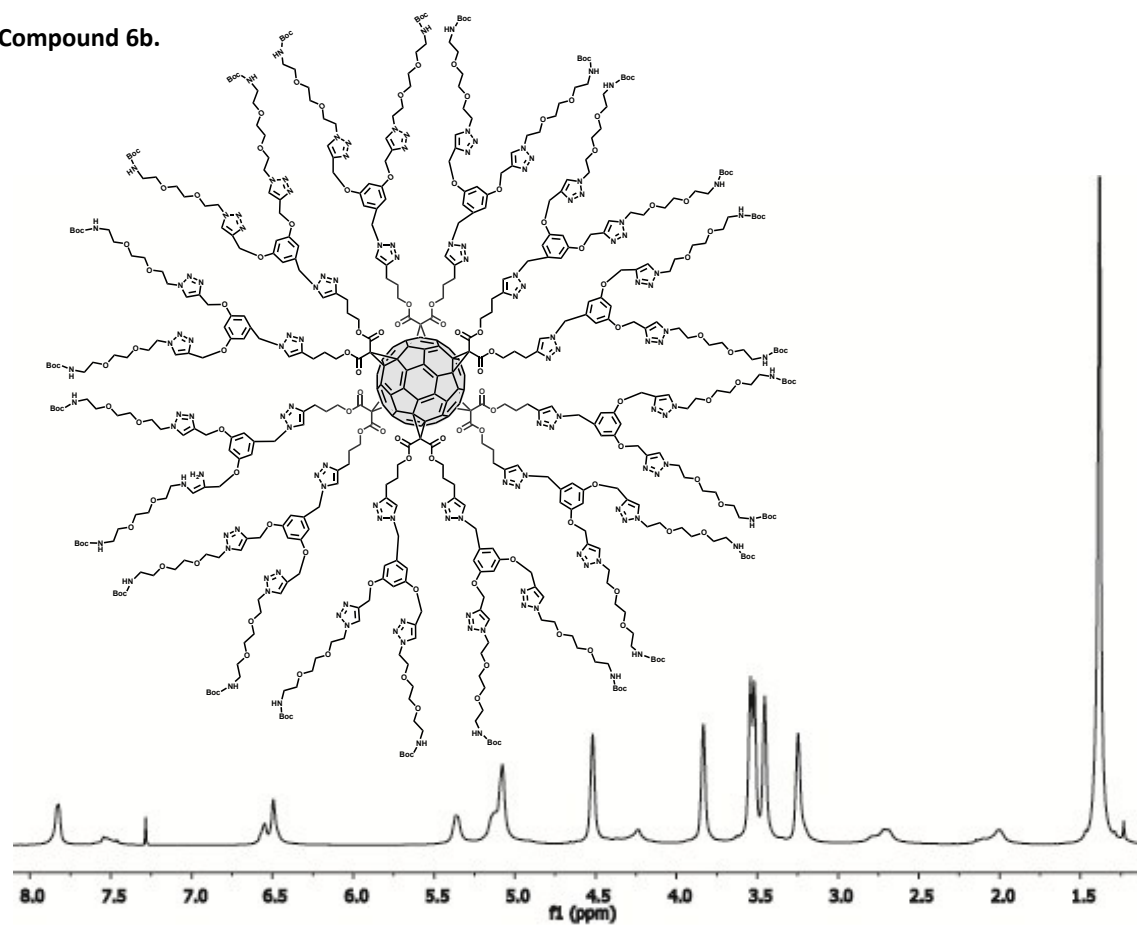

<sup>1</sup>H NMR spectrum (700 MHz, CDCl<sub>3</sub>) of compound 6b

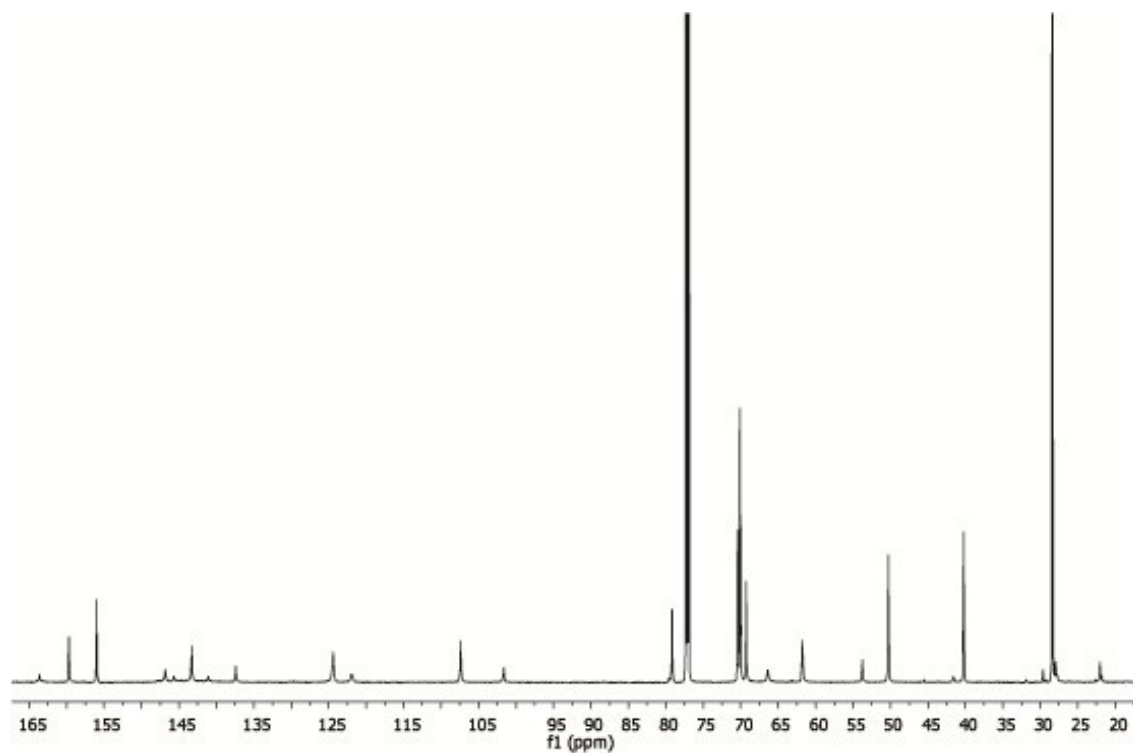

<sup>13</sup>C NMR spectrum (175 MHz, CDCl<sub>3</sub>) of compound 6b



**Compound 6c.**

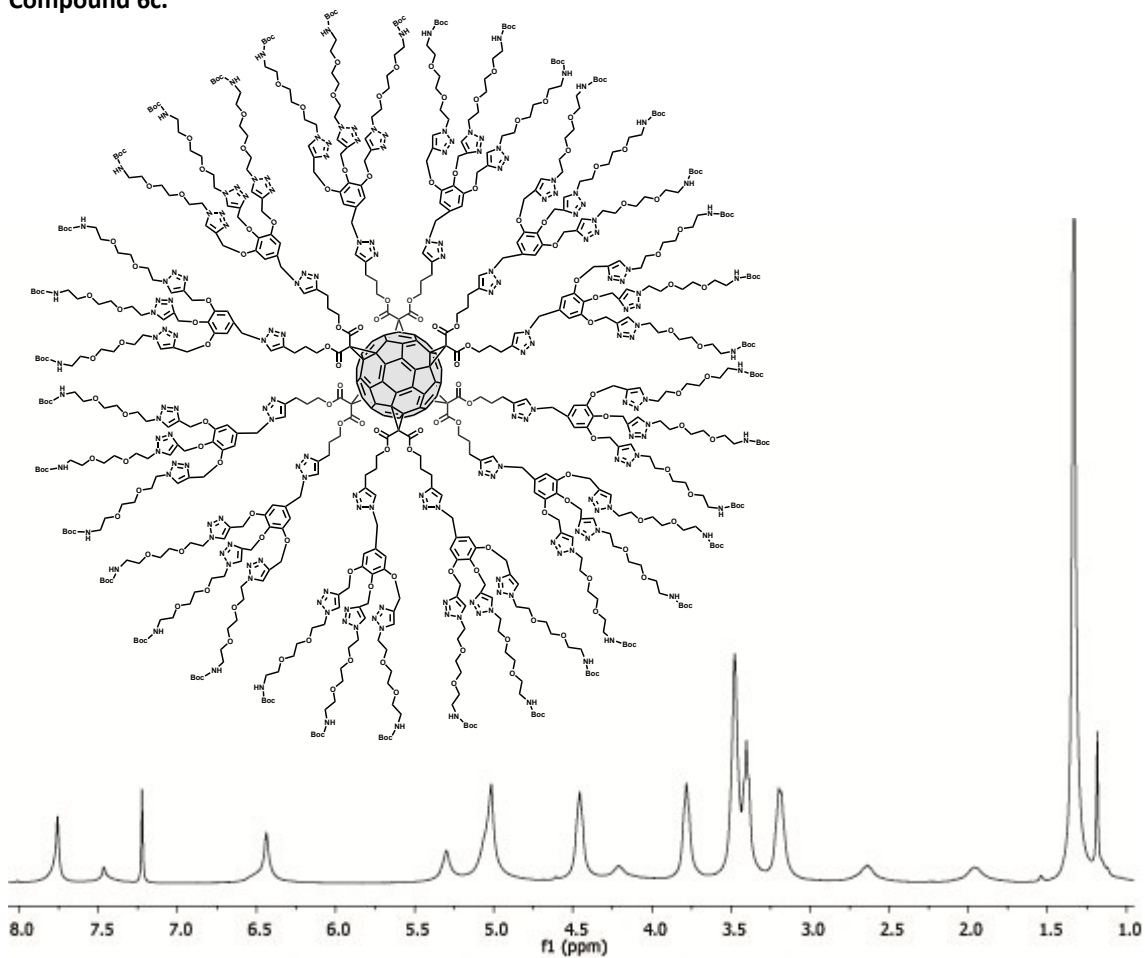

<sup>1</sup>H NMR spectrum (700 MHz, CDCl<sub>3</sub>) of compound 6c

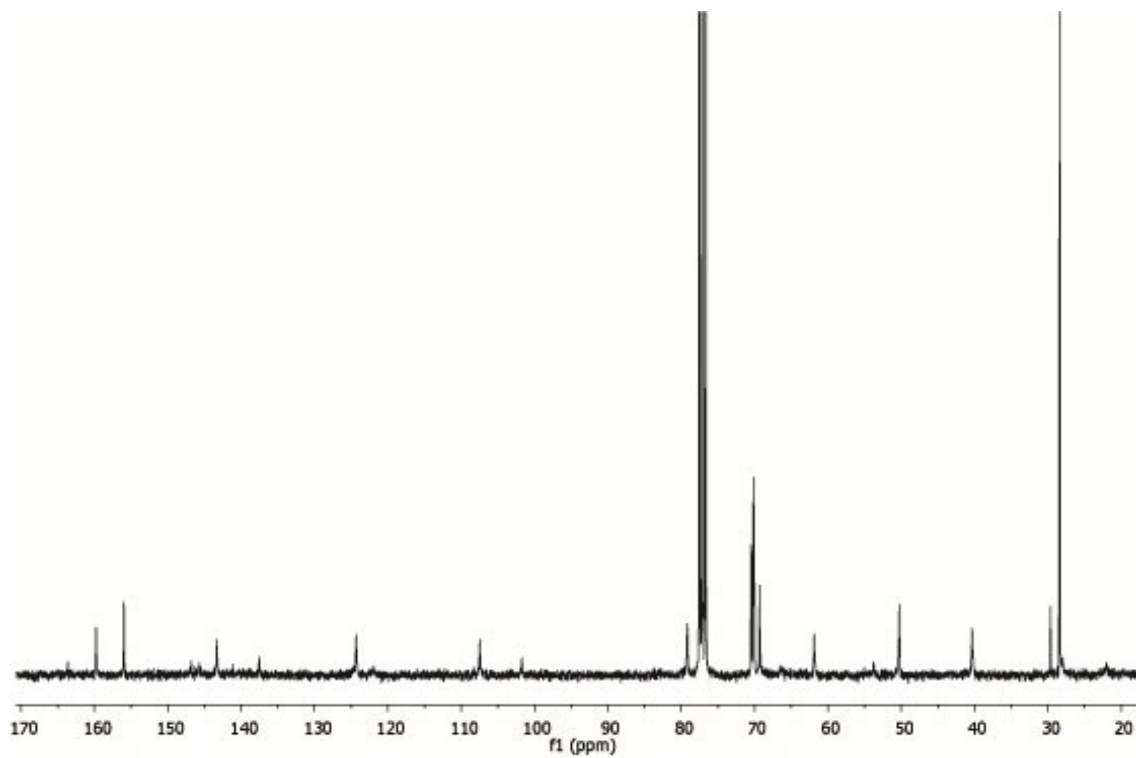

<sup>13</sup>C NMR spectrum (175 MHz, CDCl<sub>3</sub>) of compound 6c

**Compound 9.**

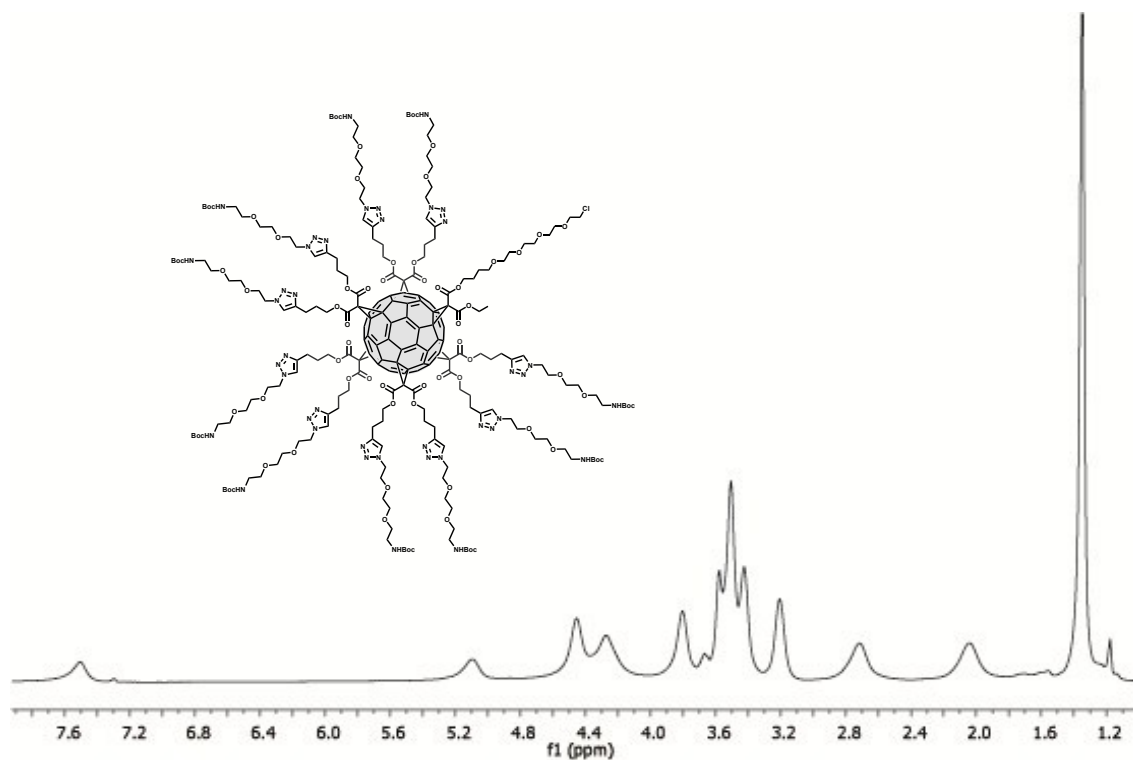

<sup>1</sup>H NMR spectrum (700 MHz, CDCl<sub>3</sub>) of compound 9

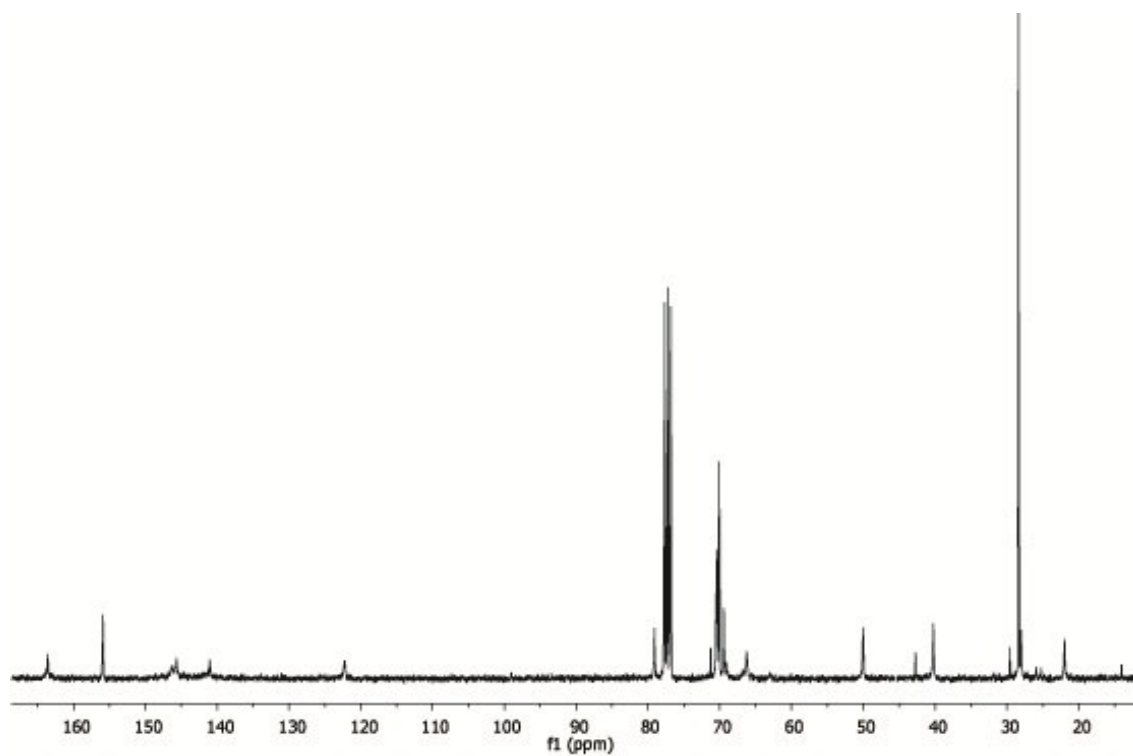

<sup>13</sup>C NMR spectrum (175 MHz, CDCl<sub>3</sub>) of compound 9

**Compound 10.**

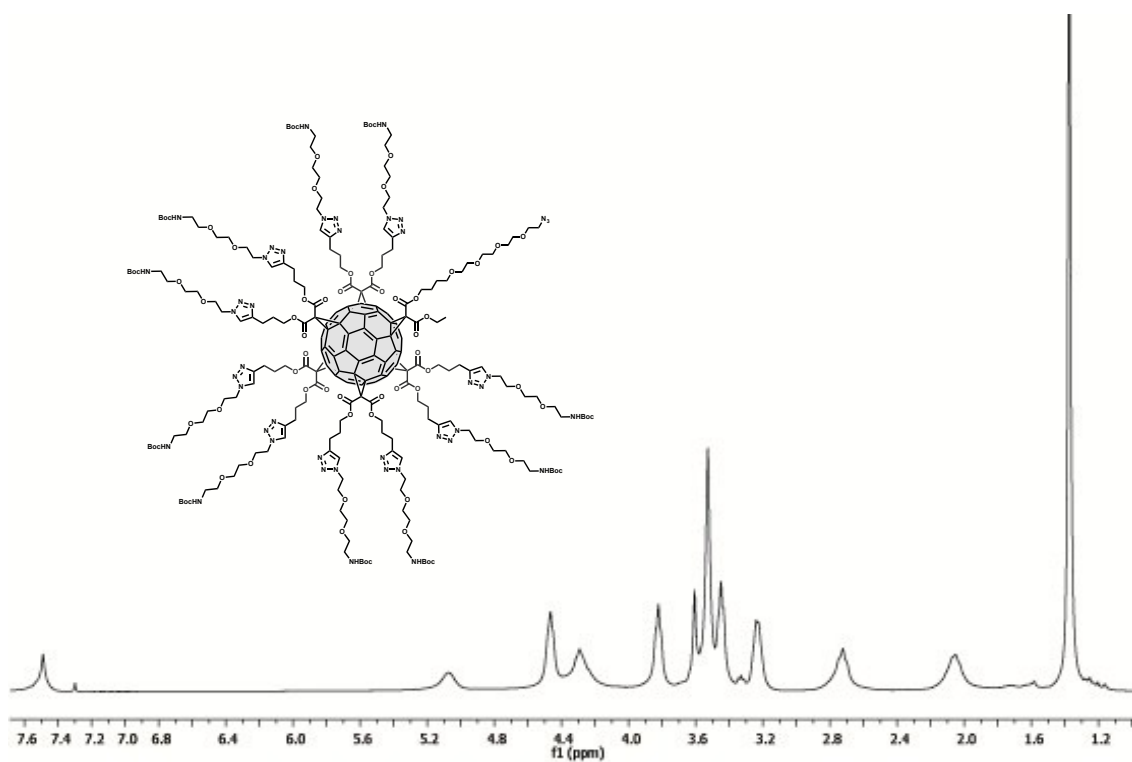

<sup>1</sup>H NMR (700 MHz, CDCl<sub>3</sub>) of compound 10

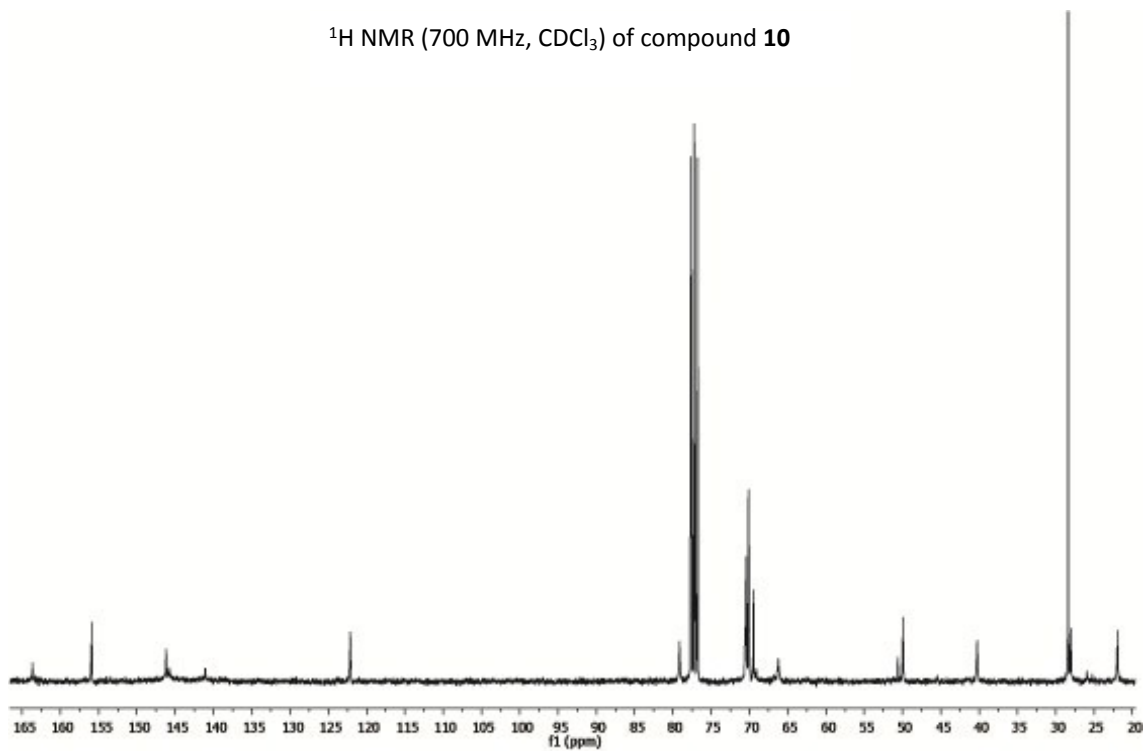

<sup>13</sup>C NMR (175 MHz, CDCl<sub>3</sub>) of compound 10



<sup>1</sup>H NMR (top) and FTIR (bottom) spectra of compounds 7a-c and 12.

Compound 7a.

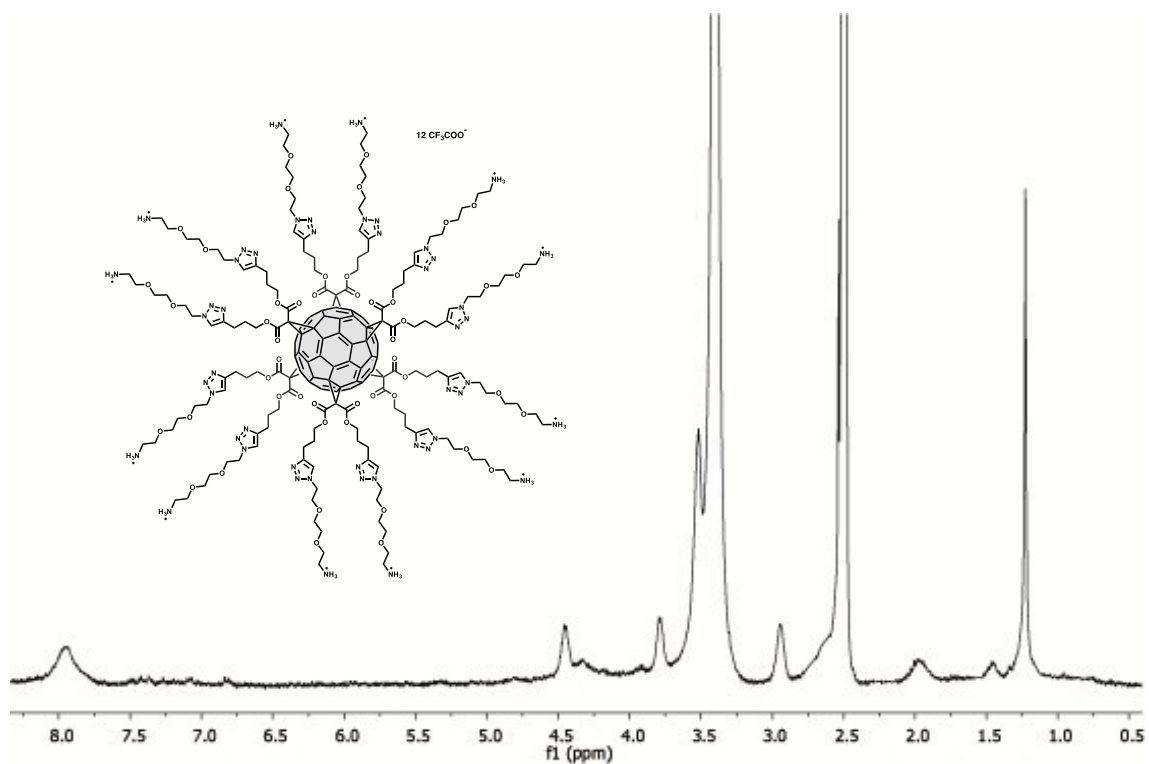

<sup>1</sup>H NMR (300 MHz, DMSO-*d*<sup>6</sup>) of compound 7a

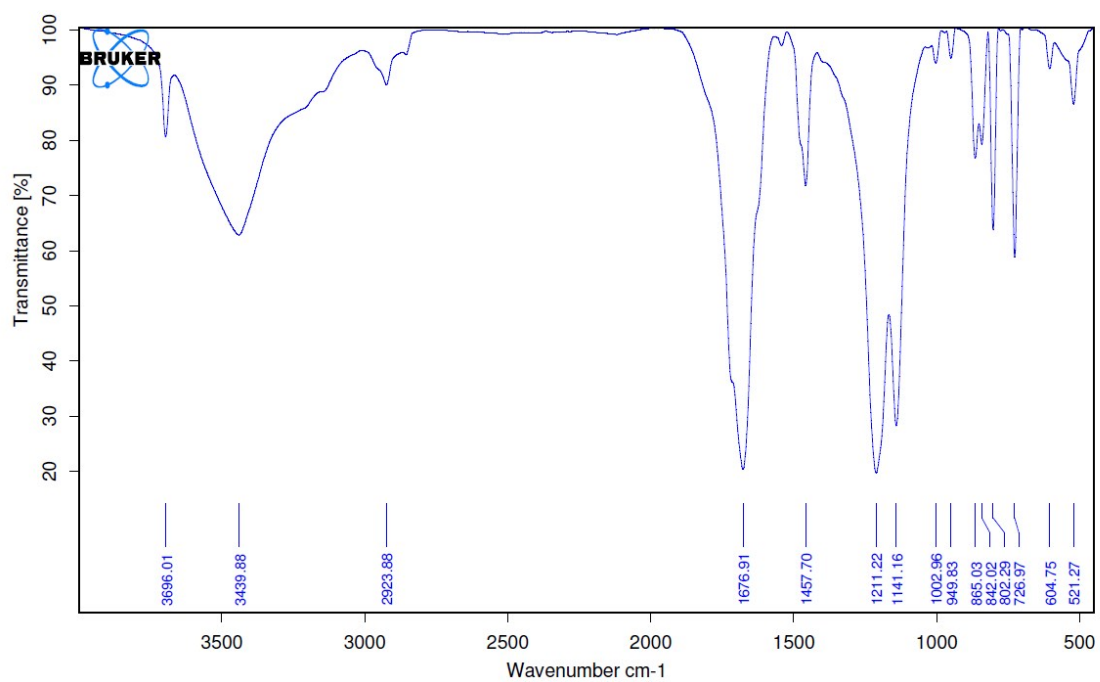

FTIR spectrum (KBr) of compound 7a

**Compound 7b.**

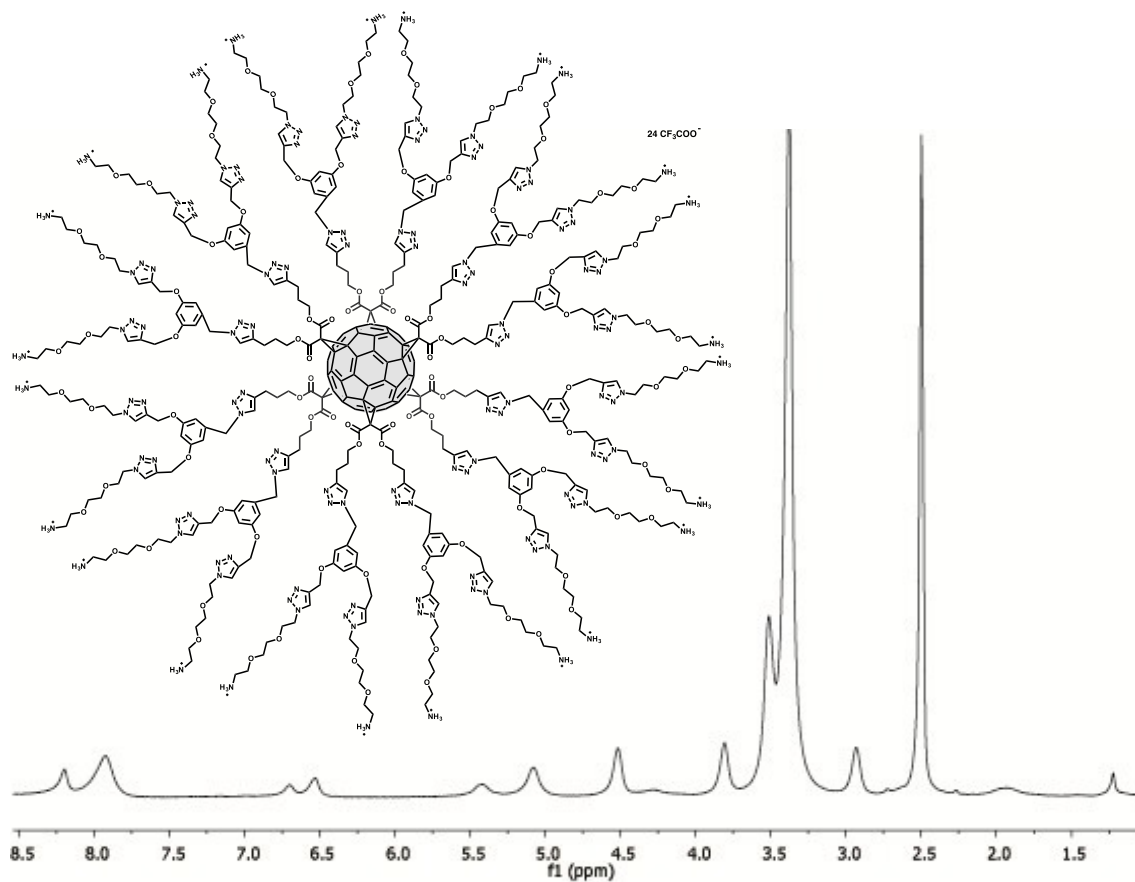

<sup>1</sup>H RMN (300 MHz, DMSO-*d*<sup>6</sup>) of compound 7b

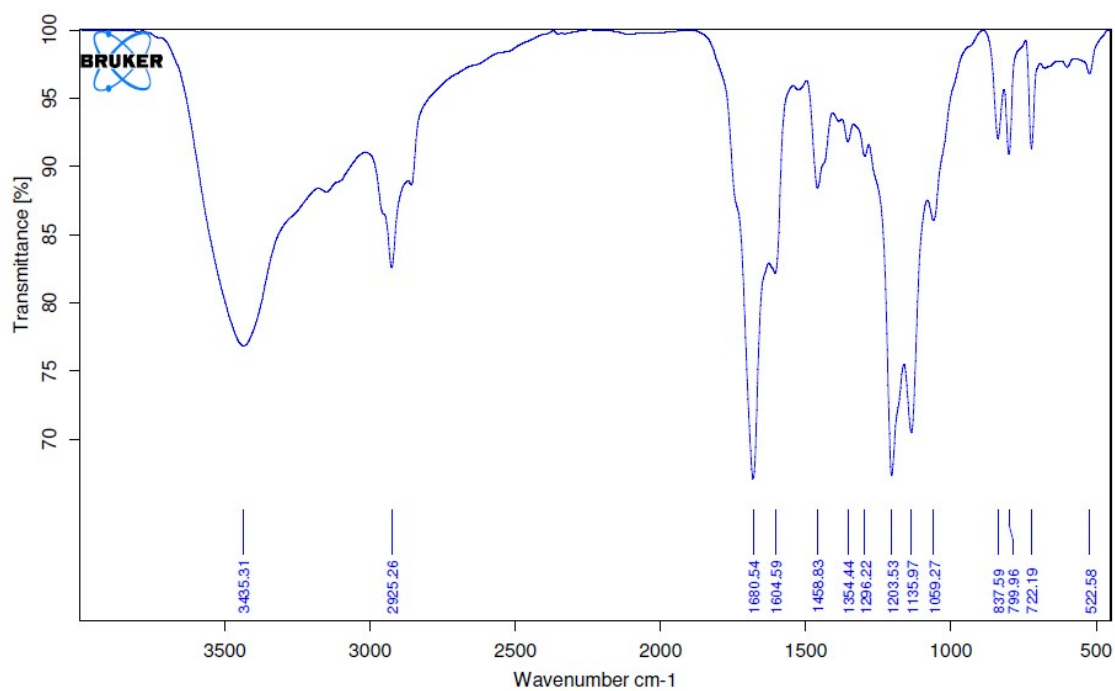

FTIR spectrum (KBr) of compound 7b

**Compound 7c.**

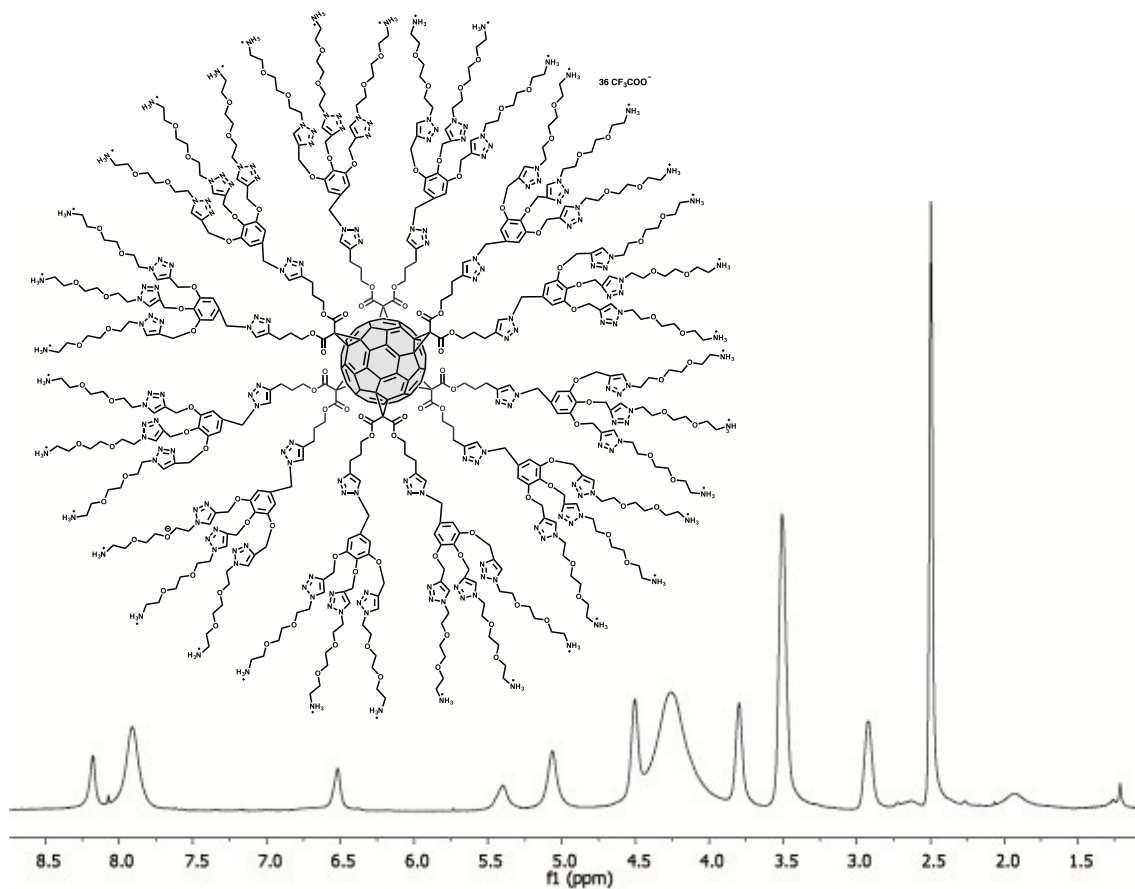

<sup>1</sup>H NMR spectrum (300 MHz, DMSO-d<sub>6</sub>) of compound 7c

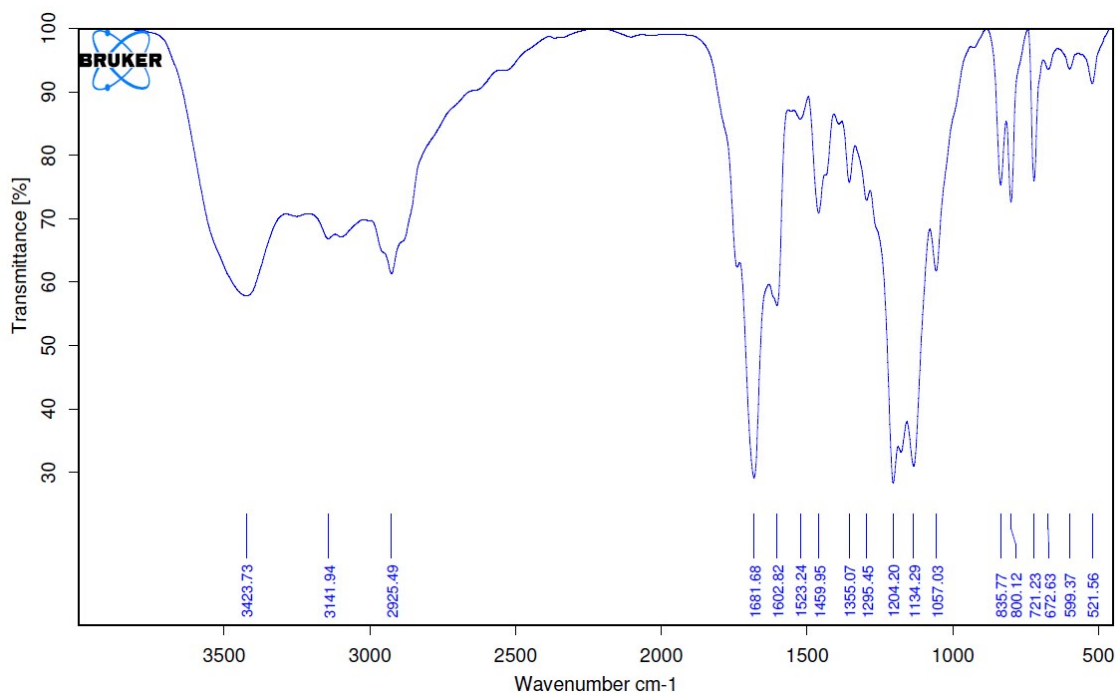

FTIR spectrum (KBr) of compound 7c

**Compound 12.**

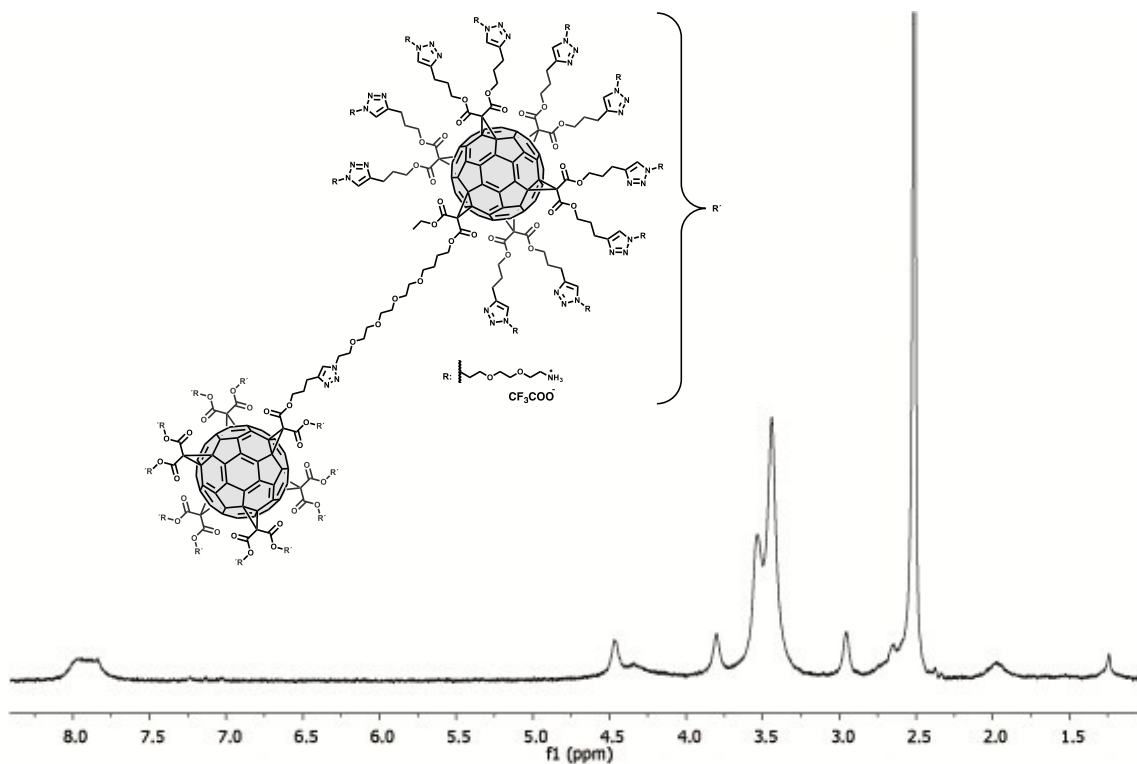

<sup>1</sup>H NMR (300 MHz, DMSO-*d*<sup>6</sup>) of compound **12**

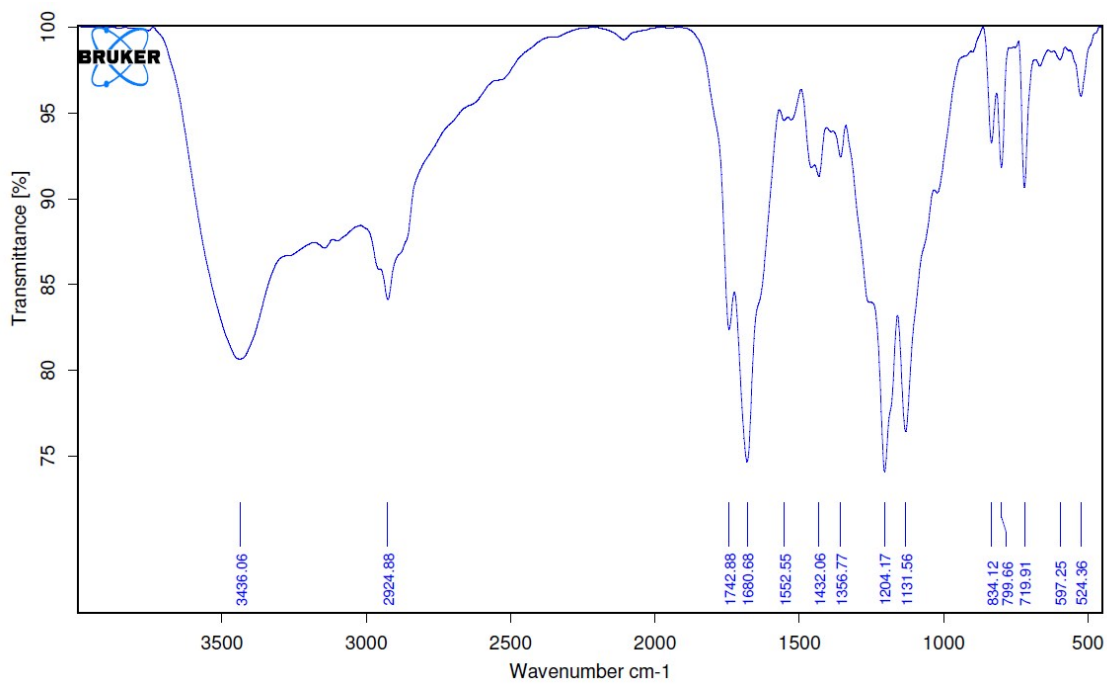

FTIR spectrum (KBr) of compound **12**



### Determination of the N/P ratios

An average molecular mass of 618 g/mol was considered for each A:T or G:C pair. The EGFP-C1 plasmid has 4700 base pairs and a molecular mass of 2904600 g/mol. Each phosphate group provides one negative charge. That means that each plasmid molecule has 9400 negative charges. In the assays we add 1  $\mu\text{g}$  of plasmid, which is equivalent to  $3.44 \cdot 10^{-13}$  mol. Considering the Avogadro number we can calculate  $2.074 \cdot 10^{11}$  plasmid units per assay. In summary, for 1  $\mu\text{g}$  of added plasmid we have  $1.95 \cdot 10^{15}$  total negative charges. Considering the molecular masses of the fullerene compounds and the amount added, we could obtain the following N/P ratios:

**Table S1.** N/P Ratios calculated for the concentrations employed in the transfection experiments

|           | <b>40 <math>\mu\text{M}</math></b> | <b>8 <math>\mu\text{M}</math></b> | <b>1.6 <math>\mu\text{M}</math></b> | <b>0.32 <math>\mu\text{M}</math></b> | <b>0.064 <math>\mu\text{M}</math></b> |
|-----------|------------------------------------|-----------------------------------|-------------------------------------|--------------------------------------|---------------------------------------|
| <b>7a</b> | 7.4                                | 1.5                               | 0.3                                 | 0.06                                 | 0.012                                 |
| <b>7b</b> | 15                                 | 3                                 | 0.6                                 | 0.12                                 | 0.025                                 |
| <b>7c</b> | 22.25                              | 4.4                               | 0.9                                 | 0.18                                 | 0.037                                 |
| <b>7d</b> | 74                                 | 15                                | 3                                   | 0.6                                  | 0.12                                  |

### Cytotoxicity assay

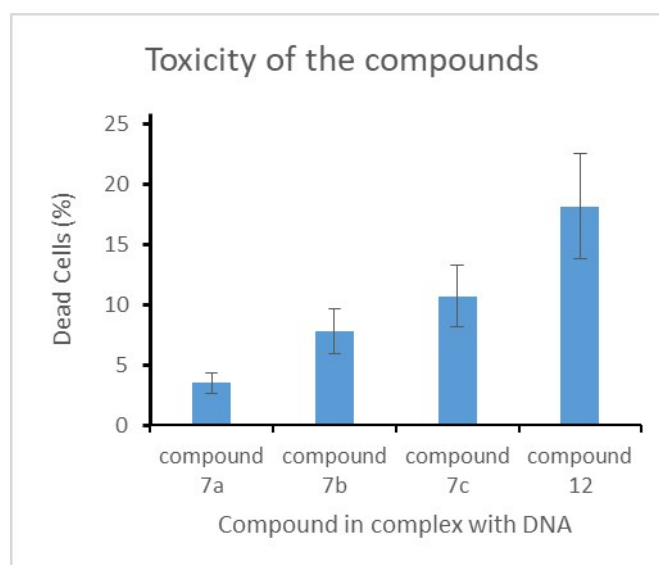

**Figure S1.** The cytotoxicity exerted by the various fullerene compounds when complexed to plasmidic DNA was determined 12 hours post-addition of the complexes. The amount of dead cells was counted in a field of approximately 1000 cells in total.

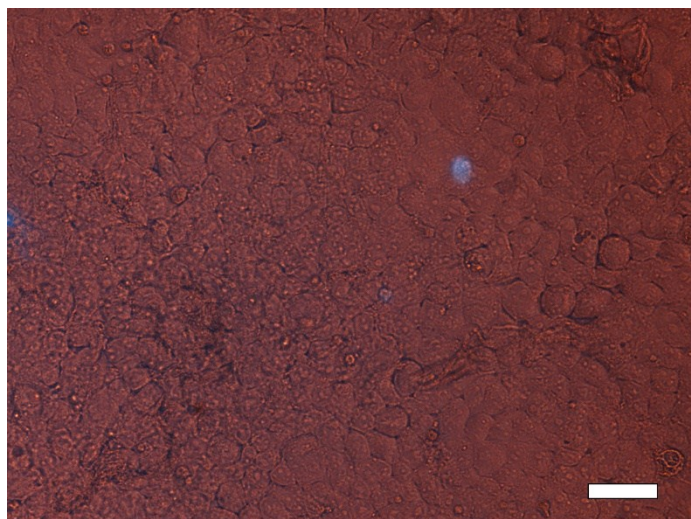

**Figure S2.** The figure shows an overlay of bright field and 405 nm excitation of confluent HEK293 cells incubated with compound **7a** complexed with plamidic DNA. Emission of blue fluorescence correspond to dead cells with fragmented membranes and the Hoechst dye labelling the cell nuclei. Bar, 50  $\mu$ M.

### DLS experiments

For compounds **7a-c** and **12**, Dynamic Light Scattering measurements were carried out at 25°C on an ALV GSC08 correlator working in a cross correlation mode with an Ar+ laser operating at  $\lambda = 514.5$  nm. The output signals were obtained with backscatter detection at an angle of 90° and processed with a digital correlator that computed intensity-intensity autocorrelation of the scattered light. Measurements were made in a 1-cm path-length round quartz cell maintained at 298 K. Solution samples of  $10^{-4}$  M in PBS buffer were filtered through nylon Acrodisc syringe filters (Pall Life Sciences) with 0.2- $\mu$ m pore size.

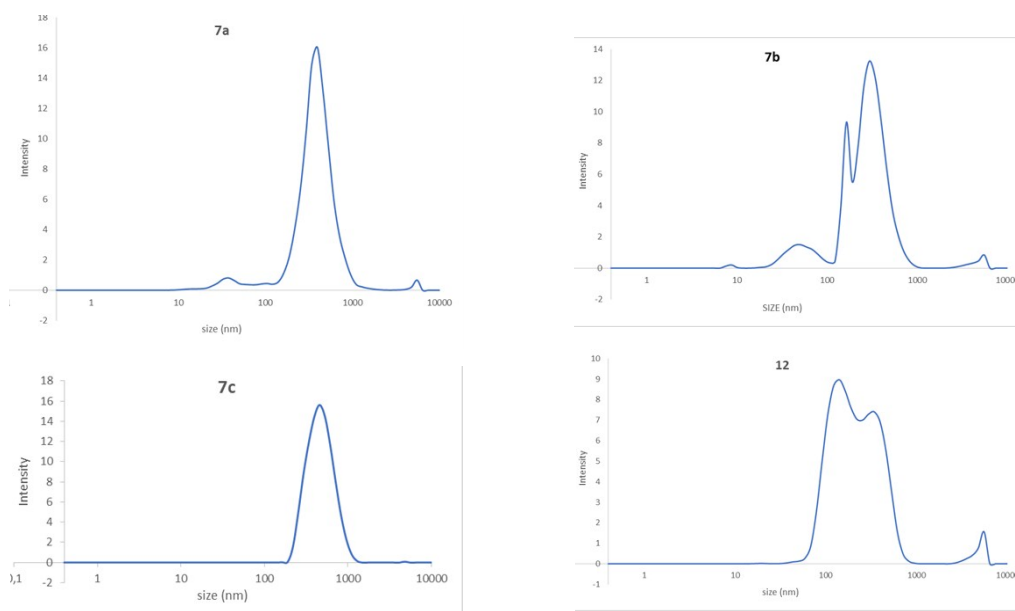

**Figure S3.** Representative DLS for **7a-c** and **12**, intensity vs. particle size distribution.
